# Supplementary material for: A Nurse Home Visiting Program for Pregnant Adolescents: A Randomized Controlled Trial
Source: Research Square preprint supplement (doi:10.21203/rs.3.rs-111192/v1), 2020-12-28
Supplement: Supplementary file 1 [file 199cef02e7541d971549d3ba.docx]

**Title**: A Nurse Home Visiting Program for Pregnant Adolescents: A Randomized Controlled Trial

**Authors**: Daniel Fatori* (1), Pedro Fonseca Zuccolo (1), Elizabeth Shephard (1), Helena Brentani (1), Alicia Matijasevich (2), Alexandre Archanjo Ferraro (3), Lislaine Aparecida Fracolli (4), Anna Maria Chiesa (4), James Leckman (5), Euripedes Constantino Miguel Filho (1), Guilherme V. Polanczyk* (1)

**Affiliation**: (1) Departamento de Psiquiatria, Faculdade de Medicina FMUSP, Universidade de Sao Paulo, São Paulo, SP, BR.; (2) Departamento de Medicina Preventiva, Faculdade de Medicina FMUSP, Universidade de São Paulo, São Paulo, Brasil; (3) Departamento de Pediatria, Faculdade de Medicina FMUSP, Universidade de São Paulo, São Paulo, SP, BR; (4) Departamento de Enfermagem em Saúde Coletiva da Escola de Enfermagem, Universidade de São Paulo, São Paulo, Brasil; (5) Yale Child Study Center, Yale University School of Medicine, New Haven, USA

**Supplemetary Files**

| **Table S2**. Differences at baseline between participants included vs. not included in the efficacy analyses. Data depicted as mean (SD) or N (%). | | | | | | | | | | | | |
| --- | --- | --- | --- | --- | --- | --- | --- | --- | --- | --- | --- | --- |
|  | **BSID outcome** | | | **HOME outcome** | | | **Body Mass Index (z score) outcome** | | | **Length/Height-for-age (z score) outcome** | | |
| **Characteristics at baseline** | **Not included** | **Included** | **p value** | **Not included** | **Included** | **p value** | **Not included** | **Included** | **p value** | **Not included** | **Included** | **p value** |
| **Maternal age** | 17.4 (0.5) | 17.1 (1.3) | 0.402 | 17.3 (0.6) | 17.1 (1.3) | 0.651 | 17.6 (0.5) | 17.1 (1.3) | 0.313 | 17.5 (0.5) | 17.1 (1.3) | 0.359 |
| **Maternal ethnicity, White** | 3 (33.3%) | 22 (31.0%) | 1.000 | 3 (27.3%) | 22 (31.9%) | 1.000 | 2 (28.6%) | 23 (31.5%) | 1.000 | 3 (37.5%) | 22 (30.6%) | 0.700 |
| **Mother is enrolled in school** | 0 | 35 (49.3%) | **0.004** | 1 (9.1%) | 34 (49.3%) | **0.019** | 0 | 35 (47.9%) | **0.016** | 0 | 35 (48.6%) | **0.008** |
| **Grandmother educational level, Illiterate/Inc. primary education** | 3 (33.3%) | 34 (47.9%) | 0.494 | 3 (27.3%) | 34 (49.3%) | 0.208 | 3 (42.9%) | 34 (46.6%) | 1.000 | 3 (37.5%) | 34 (47.2%) | 0.719 |
| **Maternal educational level, Illiterate/Inc. primary education** | 3 (33.3%) | 9 (12.7%) | 0.129 | 3 (27.3%) | 9 (13.0%) | 0.357 | 3 (42.9%) | 9 (12.3%) | 0.065 | 3 (37.5%) | 9 (12.5%) | 0.094 |
| **Maternal occupation, Working for pay** | 2 (22.2%) | 13 (18.3%) | 0.674 | 2 (18.2%) | 13 (18.8%) | 1.000 | 1 (14.3%) | 14 (19.2%) | 1.000 | 2 (25.0%) | 13 (18.1%) | 0.640 |
| **Family enrolled in social welfare program** | 2 (22.2%) | 19 (26.8%) | 1.000 | 3 (27.3%) | 18 (26.1%) | 1.000 | 2 (28.6%) | 19 (26.0%) | 1.000 | 2 (25.0%) | 19 (26.4%) | 1.000 |
| **Number of people living in the residence** | 2.8 (1.1) | 3.7 (1.7) | 0.112 | 2.9 (1.2) | 3.7 (1.7) | 0.134 | 2.8 (1.2) | 3.7 (1.7) | 0.213 | 2.7 (1.8) | 3.7 (1.7) | 0.125 |
| **Family income, 0-800 reais** | 2 (28.6%) | 13 (19.7%) | 0.627 | 2 (22.2%) | 13 (20.3%) | 1.000 | 2 (33.3%) | 13 (19.4%) | 0.596 | 2 (28.6%) | 13 (19.7%) | 0.627 |
| **Maternal lifetime police problems** | 2 (22.2%) | 6 (8.6%) | 0.225 | 2 (18.2%) | 6 (8.8%) | 0.308 | 1 (14.3%) | 7 (9.7%) | 0.541 | 0.1 (0.3) | 0.1 (0.3) | 0.817 |
| **Presence of family food insecurity** | 5 (55.6%) | 29 (40.8%) | 0.484 | 5 (45.4%) | 29 (42.0%) | 1.000 | 4 (57.1%) | 30 (41.1%) | 0.451 | 4 (50.0%) | 30 (41.7%) | 0.717 |
| **Maternal history of substance use** | 3 (33.3%) | 28 (39.4%) | 1.000 | 3 (27.3%) | 28 (40.6%) | 0.515 | 3 (42.9%) | 28 (38.4%) | 1.000 | 3 (37.5%) | 28 (38.9%) | 1.000 |
| **Presence of maternal chronic disease** | 2 (22.2%) | 6 (8.4%) | 0.220 | 2 (18.2%) | 6 (8.7%) | 0.302 | 2 (28.6%) | 6 (8.2%) | 0.143 | 2 (25.0%) | 6 (8.3%) | 0.181 |
| **Presence of maternal sexually transmitted disease** | 2 (22.2%) | 6 (8.4%) | 0.220 | 2 (18.2%) | 6 (8.7%) | 0.302 | 1 (14.3%) | 7 (9.6%) | 0.536 | 2 (25.0%) | 6 (8.3%) | 0.181 |
| **Maternal Self-efficacy** | 30.5 (2.2) | 29.4 (6.8) | 0.643 | 31.1 (6.0) | 29.3 (6.9) | 0.424 | 29.6 (7.0) | 29.6 (6.8) | 0.997 | 29.7 (6.4) | 29.5 (6.8) | 0.935 |
| **Maternal Depression a** | 1 (11.1%) | 16 (22.5%) | 0.676 | 1 (9.1%) | 16 (23.2%) | 0.441 | 1 (14.3%) | 16 (21.9%) | 1.000 | 1 (12.5%) | 16 (22.2%) | 1.000 |
| **Maternal Suicidal Ideation** | 0 | 3 (4.2%) | 1.000 | 0 | 3 (4.3%) | 1.000 | 0 | 3 (4.1%) | 1.000 | 0 | 3 (4.2%) | 1.000 |
| **Maternal Anxiety b** | 0 | 10 (14.1%) | 0.593 | 0 | 10 (14.5%) | 0.342 | 0 | 10 (13.7%) | 0.587 | 0 | 10 (13.9%) | 0.586 |
| **Maternal ADHD c** | 2 (22.2%) | 9 (12.7%) | 0.603 | 2 (18.2%) | 9 (13.0%) | 0.643 | 2 (28.6%) | 9 (12.3%) | 0.245 | 2 (25.0%) | 9 (12.5%) | 0.302 |
| **Maternal history of emotional abuse d** | 4 (44.4%) | 10 (14.1%) | **0.045** | 4 (36.4%) | 10 (14.5%) | 0.095 | 4 (57.1%) | 10 (13.7%) | **0.016** | 4 (50.0%) | 10 (13.9%) | **0.028** |
| **Maternal history of physical abuse e** | 1 (11.1%) | 6 (8.4%) | 0.581 | 1 (9.1%) | 6 (8.7%) | 1.000 | 1 (14.3%) | 6 (8.2%) | 0.487 | 1 (12.5%) | 6 (8.3%) | 0.536 |
| **Maternal history of sexual abuse f** | 0 | 5 (7.0%) | 1.000 | 0 | 5 (7.2%) | 1.000 | 0 | 5 (6.8%) | 1.000 | 0 | 5 (6.9%) | 1.000 |
| **Maternal history of emotional neglect g** | 1 (11.1%) | 8 (11.3%) | 1.000 | 1 (9.1%) | 8 (11.6%) | 1.000 | 1 (14.3%) | 8 (11.0%) | 0.581 | 1 (12.5%) | 8 (11.1%) | 1.000 |
| **Maternal history of physical neglect h** | 1 (11.1%) | 5 (7.0%) | 0.523 | 1 (9.1%) | 5 (7.2%) | 1.000 | 1 (14.3%) | 5 (6.8%) | 0.434 | 1 (12.5%) | 5 (6.9%) | 0.480 |

a BDI moderate or severe levels (score >20), b BAI moderate or severe levels (score >16), c ASRS clinical level (score >9), d CTQ moderate or severe levels (score >13), e CTQ moderate or severe levels (score >10), f CTQ moderate or severe levels (score >8), g CTQ moderate or severe levels (score >15), h CTQ moderate or severe levels (score >10).

Abbreviation: ADHD=attention-deficit/hyperactivity disorder, ASRS=ADHD Self-report scale, BAI=Beck Anxiety Inventory, BDI=Beck Depression Inventory, BSID=Bayley Scales of Infant Development, CTQ=Childhood trauma questionnaire, Inc=incomplete.
